# Supplementary material
Source: publisher figshare collection journal article supplement (https://acs.figshare.com/ndownloader/files/5814474)
Supplement: Supplementary file 1 [file 5814474]

### Supplemental Material

A. Fourier transformed (a) and  $k^3$ -weighted W L<sub>III</sub>-edge EXAFS function ( $k^3 \cdot \chi(k)$ ) (b) of the Ni-WO<sub>3</sub>/Al<sub>2</sub>O<sub>3</sub>-F catalyst sulfided at 400°C. Measured data — and curve fitting results ---.

B. Fourier transformed (a) and  $k^3$ -weighted W L<sub>III</sub>-edge EXAFS function ( $k^3 \cdot \chi(k)$ ) (b) of the Ni-ATT/Al<sub>2</sub>O<sub>3</sub> catalyst sulfided at 400°C. Measured data — and curve fitting results ---.

C. Fourier transformed (a) and  $k^3$ -weighted W L<sub>III</sub>-edge EXAFS function ( $k^3 \cdot \chi(k)$ ) (b) of the Ni-ATT/Al<sub>2</sub>O<sub>3</sub>-F catalyst sulfided at 400°C. Measured data — and curve fitting results ---.

D. Fourier transformed (a) and  $k^3$ -weighted Ni K-edge EXAFS function ( $k^3 \cdot \chi(k)$ ) (b) of the Ni-WO<sub>3</sub>/Al<sub>2</sub>O<sub>3</sub>-F catalyst sulfided at 400°C. Measured data — and curve fitting results ---.

E. Fourier transformed (a) and  $k^3$ -weighted Ni K-edge EXAFS function ( $k^3 \cdot \chi(k)$ ) (b) of the Ni-ATT/Al<sub>2</sub>O<sub>3</sub>-F catalyst sulfided at 400°C. Measured data — and curve fitting results ---.

F. Fourier transformed (a) and  $k^3$ - weighted W L<sub>III</sub>-edge EXAFS function ( $k^3 \cdot \chi(k)$ ) (b)  
of the Ni-WO<sub>3</sub>/Al<sub>2</sub>O<sub>3</sub> (RT) catalyst sulfided at 400°C. Measured data ——— and  
curve fitting results --- .

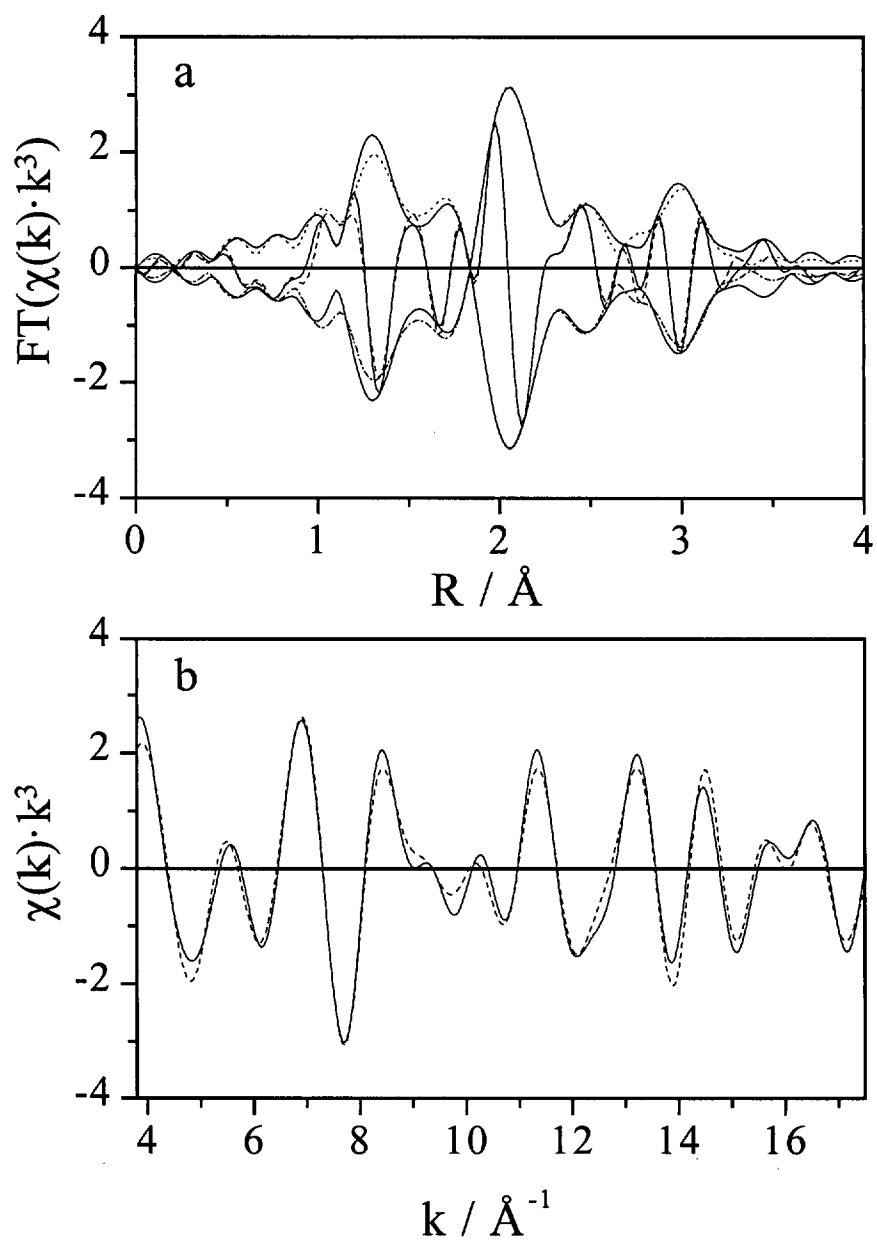

Figure A

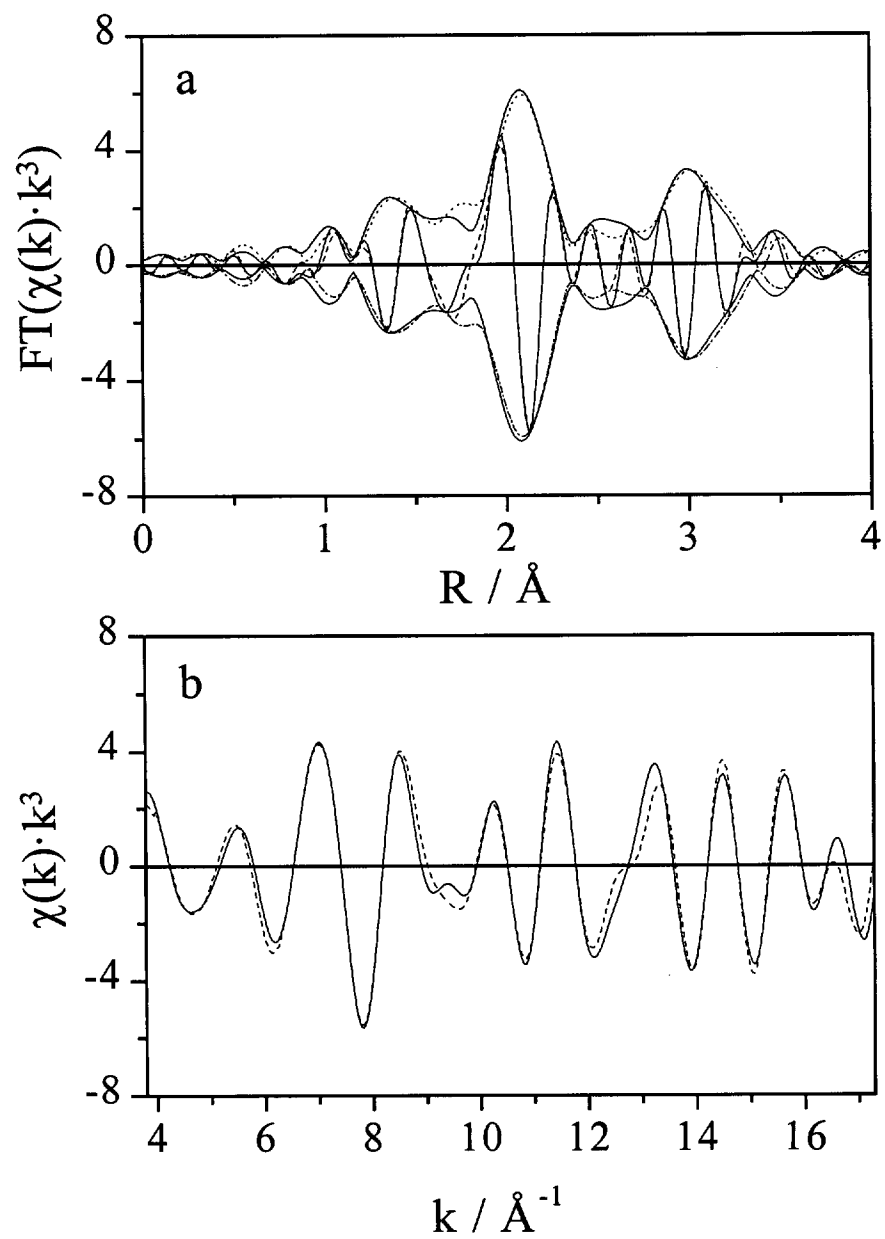

Figure B

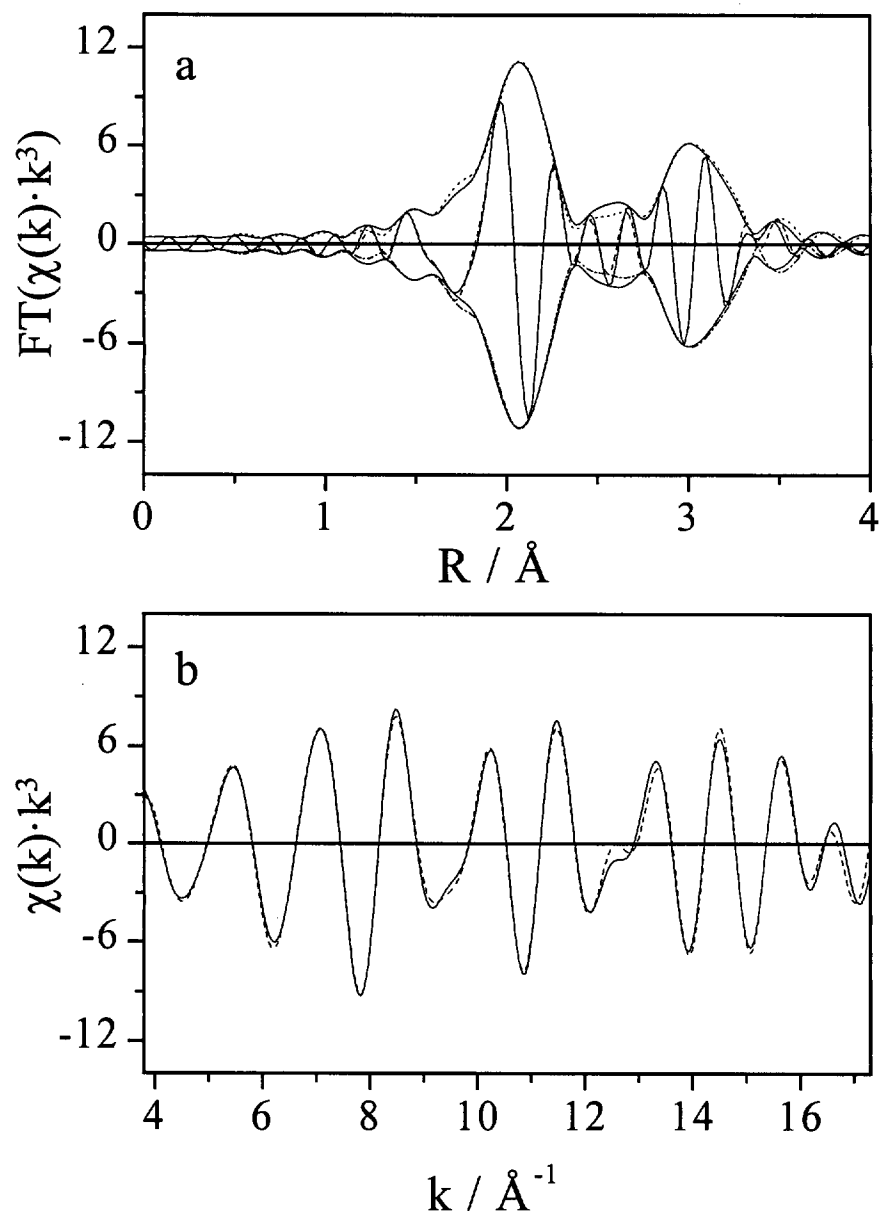

Figure C

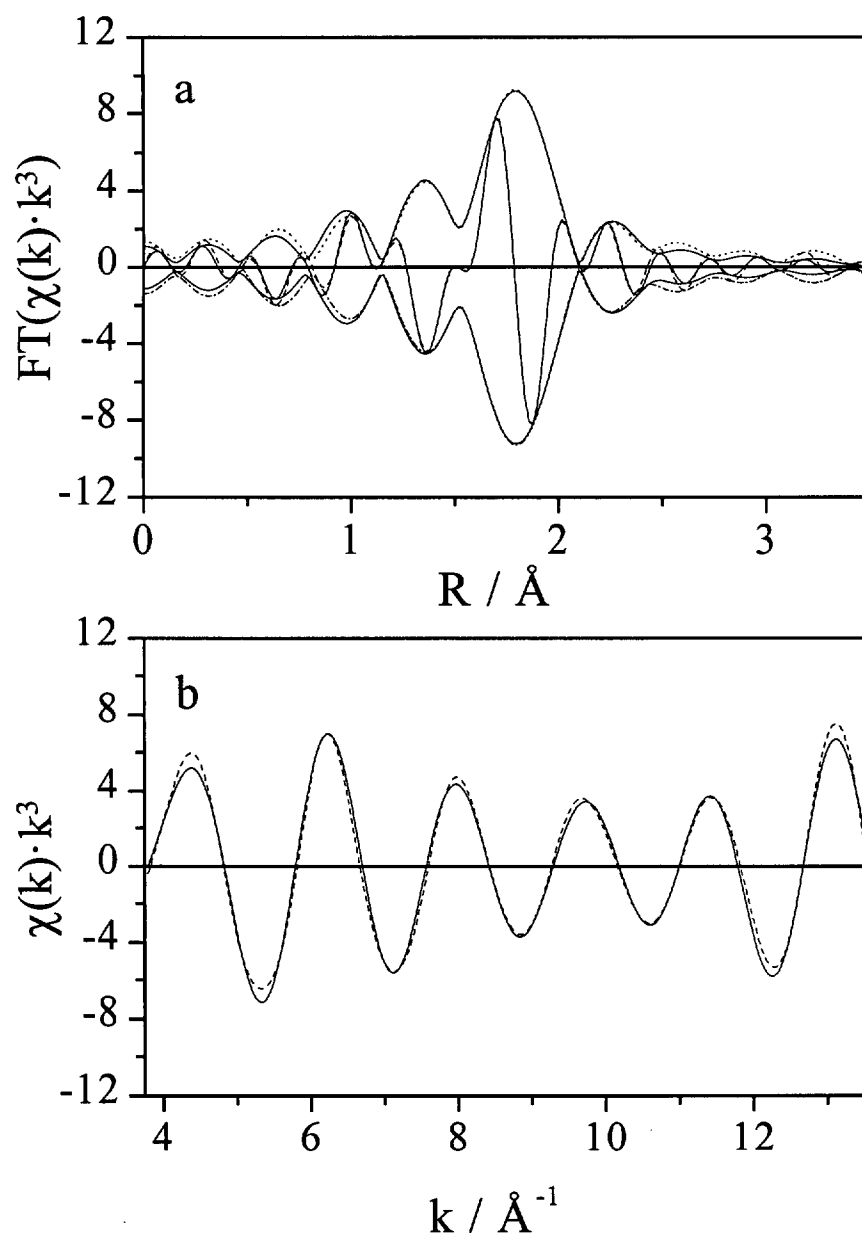

Figure D

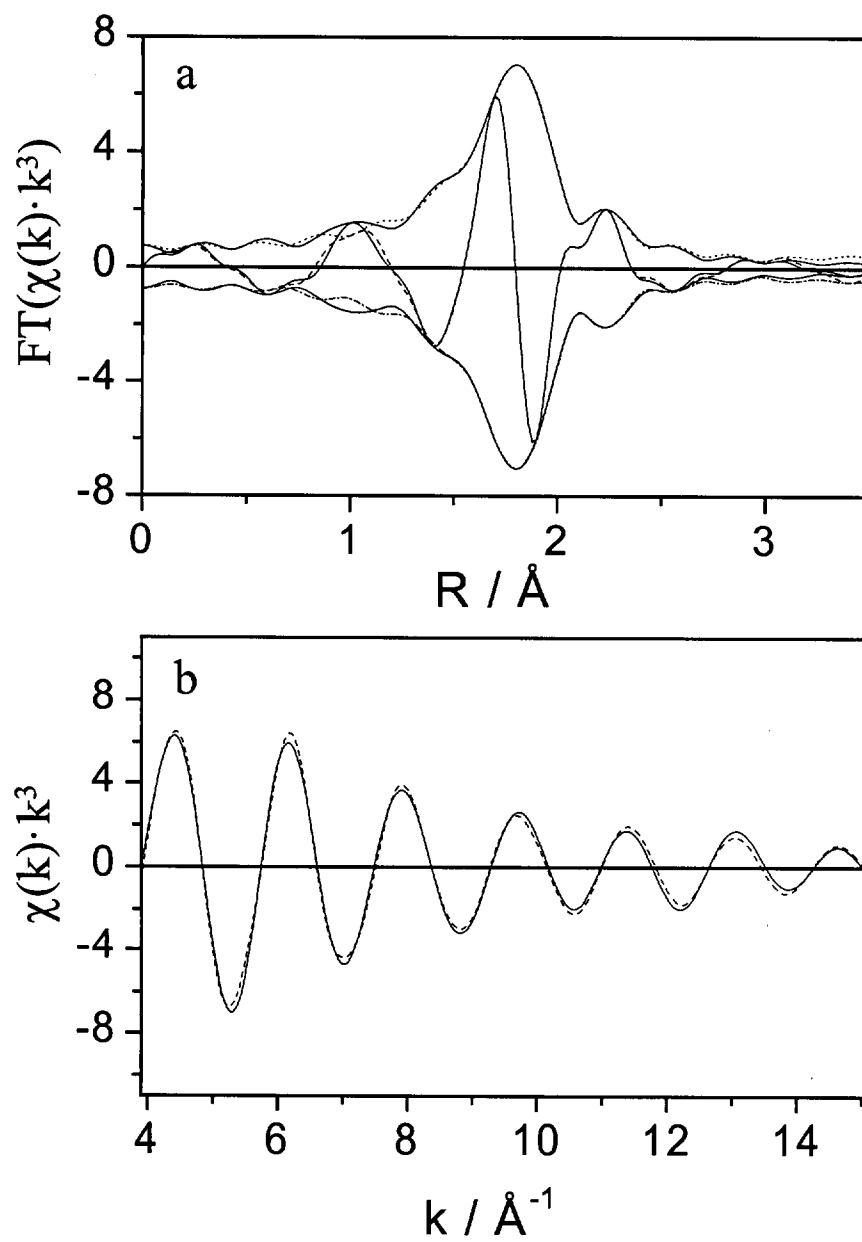

Figure E

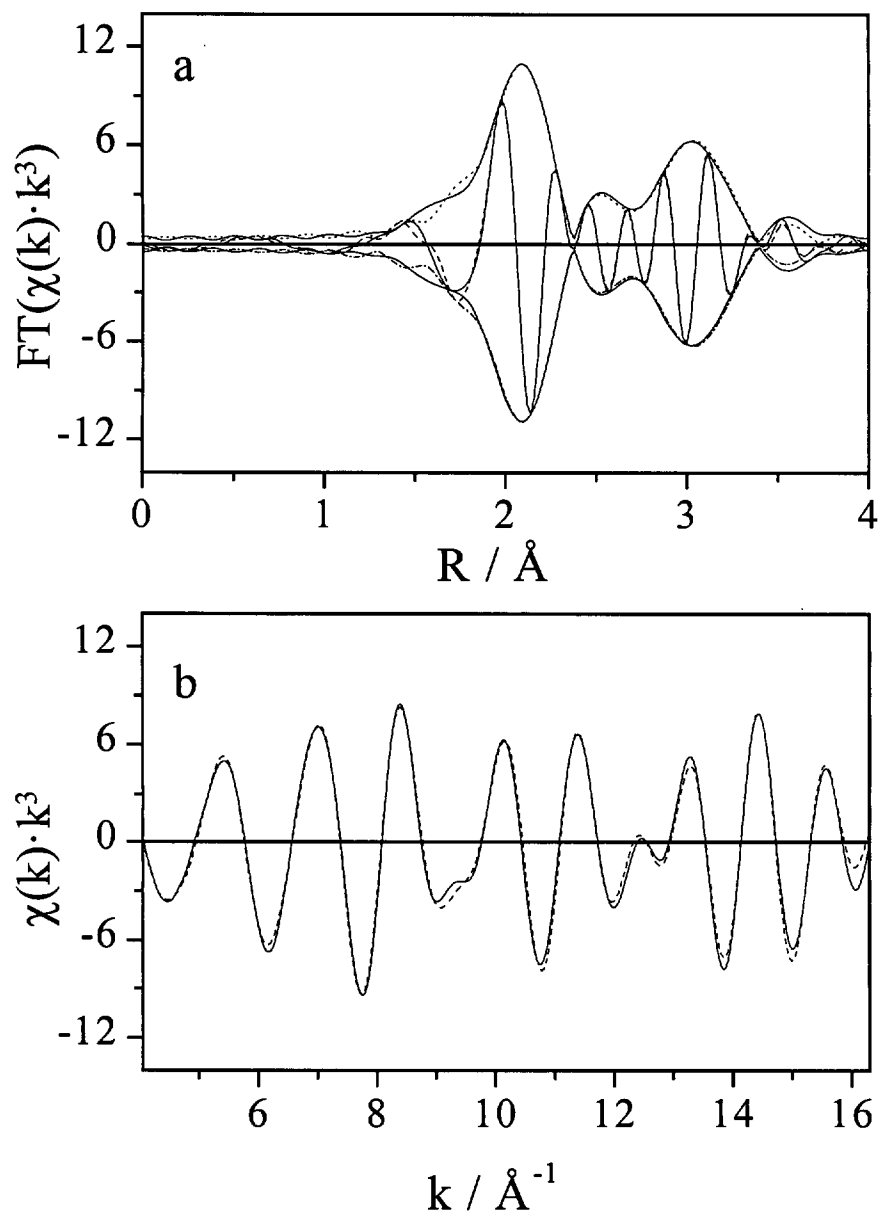

Figure F
